# Supplementary material
Source: MDPI journal article supplement (https://www.mdpi.com/2306-5710/4/1/10)
Supplement: s1 [file s1]

Evaluation of Macerating Pectinase Enzyme
Activity under Various Temperature, pH and
Ethanol Regimes

Andrew G. Reynolds 1, Anthony Knox 2 and Frederick Di Profio 2

Supplementary Information

**Table S1.** Reagents used in preparation of the galacturonic acid standard curve.

| Standard Number | μmoles D-Galacturonic Acid | D-Galacturonic Acid Standard Stock Solution (μL) | Sodium Acetate Buffer (μL) |
| --- | --- | --- | --- |
| 1 | 20.24 | 20 | 1980 |
| 2 | 30.36 | 30 | 1970 |
| 3 | 40.48 | 40 | 1960 |
| 4 | 50.60 | 50 | 1950 |
| 5 | 70.84 | 70 | 1930 |
| 6 | 101.20 | 100 | 1900 |
| 7 | 141.68 | 140 | 1860 |
| 8 | 172.04 | 170 | 1830 |
| 9 | 202.40 | 200 | 1800 |

**Table S2.** Reagents used in preparation of the β-mannanase standard curve. The 0.2 M sodium acetate buffer volume was 25 mL for each standard.

| Standard Number | HCU (nkat/mL) | Enzyme Stock Solution (mL) |
| --- | --- | --- |
| 1 | 5.75 | 2.0 |
| 2 | 11.50 | 4.0 |
| 3 | 23.00 | 8.0 |
| 4 | 34.50 | 12.0 |
| 5 | 46.00 | 16.0 |
| 6 | 57.50 | 20.0 |
| 7 | 71.90 | 25.0 |

Abbreviations: HCU: hemicellulase.

**Figure S1.** Impact of temperature on acid protease activity in Scottzyme Color Pro (pH = 3.5; ethanol = 0%).
